# Supplementary material for: Topical Sustained Delivery of Miltefosine Via Drug-Eluting Contact Lenses to Treat Acanthamoeba Keratitis
Source: MDPI journal article supplement (doi:10.3390/pharmaceutics14122750), 2022-12-08
Supplement: s1 [file s1]

# Supplementary Materials: Topical Sustained Delivery of Miltefosine Eluting Contact Lenses to Treat *Acanthamoeba* Keratitis

Lin Chen, Liangju Kuang, Amy E. Ross, Wissam Farhat, Nikolay Boychev, Sina Sharfi, Levi N. Kanu, Longqian Liu, Daniel S. Kohane and Joseph B. Ciolino

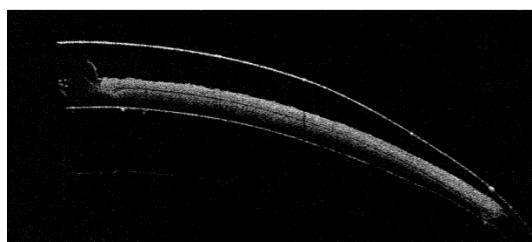

**Figure S1.** The OCT image of hydrated MLF-CL.

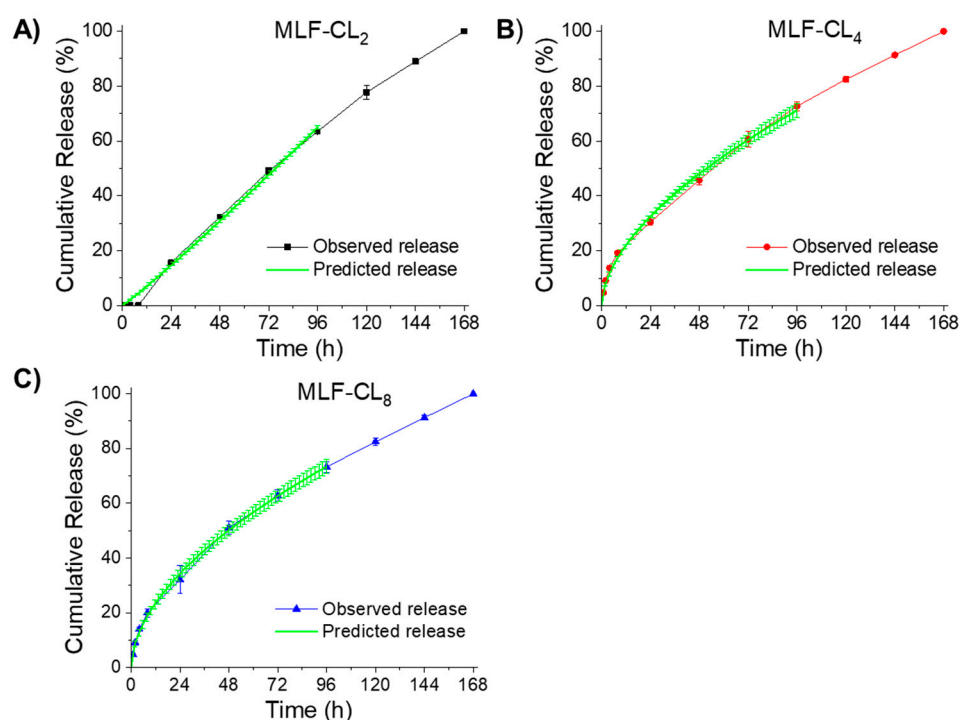

**Figure S2.** In vitro release profiles (actual cumulative release %) of MLF-CL and mathematical modeling (predicted release %) of the miltefosine release profiles. The in vitro release profiles of miltefosine from MLF-CL fit to the Korsmeyer-Peppas model. Data are shown as the means  $\pm$  SD,  $n = 4$  for each group.

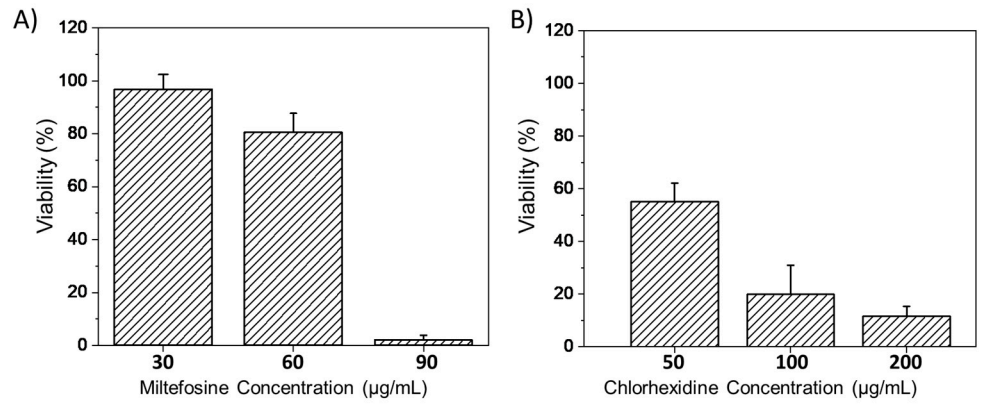

**Figure S3.** Cell viability of L929s subjected to different concentrations of A) Miltefosine (µg/mL) and B) Chlorhexidine free base drug (µg/mL).

**Table S1. Mathematical model examination for the MLF release from MLF-CL.**  $R^2$ -adjusted, Akaike Information Criterion (AIC), and the Model Selection Criterion (MSC) were employed for model selection ( $n=4$ ). The best model possesses the highest value of  $R^2$ -adjusted, the lowest AIC value, and the largest MSC.

| Model                                                     |                            | MLF-CL <sub>2</sub> |        | MLF-CL <sub>4</sub> |       | MLF-CL <sub>8</sub> |       |
|-----------------------------------------------------------|----------------------------|---------------------|--------|---------------------|-------|---------------------|-------|
|                                                           |                            | Mean                | SD     | Mean                | SD    | Mean                | SD    |
| <b>Zero-Order</b><br>$Q_t = Q_0 + K_0t$                   | $K_0$ (%*h <sup>-1</sup> ) | 0.664               | 0.008  | 0.835               | 0.027 | 0.864               | 0.030 |
|                                                           | $R^2$ -adjusted            | 0.991               | 0.001  | 0.879               | 0.021 | 0.856               | 0.029 |
|                                                           | AIC                        | 31.568              | 0.750  | 52.177              | 1.124 | 54.086              | 1.623 |
|                                                           | MSC                        | 4.023               | 0.082  | 1.875               | 0.192 | 1.706               | 0.202 |
| <b>First-Order</b><br>$\ln Q_t = \ln Q_0 + K_1t$          | $K$ (%*h <sup>-1</sup> )   | 0.009               | 0.000  | 0.014               | 0.001 | 0.015               | 0.001 |
|                                                           | $R^2$ -adjusted            | 0.971               | 0.001  | 0.950               | 0.013 | 0.952               | 0.015 |
|                                                           | AIC                        | 40.338              | 0.393  | 44.931              | 1.900 | 45.121              | 2.317 |
|                                                           | MSC                        | 2.927               | 0.061  | 2.781               | 0.315 | 2.826               | 0.359 |
| <b>Higuchi model</b><br>$Q_t = K_H(t)^{1/2}$              | $K$ (%*h <sup>-1/2</sup> ) | 5.244               | 0.075  | 7.025               | 0.215 | 7.306               | 0.273 |
|                                                           | $R^2$ -adjusted            | 0.845               | 0.004  | 0.989               | 0.004 | 0.990               | 0.010 |
|                                                           | AIC                        | 54.375              | 0.083  | 33.001              | 3.169 | 29.251              | 8.464 |
|                                                           | MSC                        | 1.172               | 0.020  | 4.271               | 0.361 | 4.810               | 1.054 |
| <b>Korsmeyer-Peppas Model</b><br>$Q_t/Q_\infty = K_k t^n$ | $K$ (%*h <sup>-n</sup> )   | 0.480               | 0.054  | 5.382               | 0.501 | 6.004               | 0.825 |
|                                                           | $n$                        | 1.076               | 0.023  | 0.566               | 0.025 | 0.550               | 0.030 |
|                                                           | $R^2$ -adjusted            | 0.992               | 0.002  | 0.994               | 0.002 | 0.994               | 0.008 |
|                                                           | AIC                        | 32.0378             | 1.6398 | 28.371              | 2.319 | 25.720              | 8.262 |
|                                                           | MSC                        | 3.9646              | 0.192  | 4.850               | 0.367 | 5.252               | 1.060 |
